# Supplementary material for: Effects of Gamma Irradiation on the Properties of Hydroxyapatite-Collagen-Chitosan-Mg-ZnO Scaffolds for Bone Tissue Engineering
Source: Hindawi journal article supplement (doi:10.1155/2023/6682223), 2023-11-11
Supplement: f1 [file 6682223.f1.docx]

**Title:** **Effects of Gamma Irradiation on the Properties of Hydroxyapatite-Collagen-Chitosan-Mg-ZnO Scaffolds for Bone Tissue Engineering**

**Tusher-Al-Arafat 1, a Shawon Ahmed 2, a, Polash Chandra Karmakar 1, a, Umme Salma Zohora2, Naznin Akhtar 1, S. M. Asaduzzaman 1, ***

1 Institute of Tissue Banking and Biomaterial Research, Atomic Energy Research Establishment (AERE), Savar, Dhaka 1349, Bangladesh

2 Department of Biotechnology & Genetic Engineering, Jahangirnagar University, Savar, Dhaka 1342, Bangladesh

*Correspondence.

S. M. Asaduzzaman, PhD

Institute of Tissue Banking and Biomaterial Research (ITBBR),

Atomic Energy Research Establishment (AERE), Savar, Dhaka 1349, Bangladesh

Tel: +880-01726894690,

E-mail: [sikderasad@yahoo.com](mailto:sikderasad@yahoo.com)

aSame contributions.

**Introduction**

**Materials and Methods**

***Extraction of nHA from bovine bone***

Thermal decomposition was used to recover hydroxyapatite (HA) from bovine bone [1]. Adult cow cortical bone (femur, tibia, fibula, humerus, radius, and ulna) was procured from a local slaughtering house (Bolivadra Bazar, Savar, Dhaka, Bangladesh). BP blade no 22 was used to clean all long bones to remove any apparent impurities and particles stuck on the bone, such as joint cartilage, ligaments, and soft tissues. Bovine bone samples were boiled for 4 to 5 days in distilled water (dH2O) to eliminate fat and other contaminants (tendon, muscle tissue). Then bones were cut into small pieces by using a bandsaw (C.-E. Reich GmbH, West Germany) and washed with dH2O. For deproteinization, boney samples were continually boiled in distilled water and dried overnight at 99°C in a hot air oven (Salvis Lab thermocentre, Switzerland). Dried bone samples were placed in ceramic jars and sintered for 3 hours at temperatures ranging from 650°C to 950°C in a special furnace (Borel, Switzerland) under ambient circumstances at a heating rate of 5°C/min. The sintered product was then crushed with a mortar and pestle and sieved with a mesh size of 200 microns. Each 18 gm of HA powder was placed in a plastic pot with 70 ml ethanol and three different sizes of 275 gm stainless steel balls. The container was placed in a ball-milling machine for 4 hours, and the samples were dried in an 80°C hot air oven for 2 hours. The nano-hydroxyapatite powder was placed in an airtight container to make a scaffold.

***Extraction of collagen***

The following procedure [2] was used to extract collagen from rabbit skin. Pretreated rabbit skins were chopped into small pieces (~1 cm2) and suspended in a 1:10 (w/v) solid-to-solvent ratio 0.5 M acetic acid (Merck) solution. The sample was shaken at 150 rpm for 24 hours at 22±2°C in a shaking incubator (Phoenix Instruments Inc., USA). The material was then filtered, and the liquid portion was called 'Acid extraction.' After the acid extraction, the non-dissolved residue was resuspended in a fresh solution of 0.5 M acetic acid at a concentration of 1:10 (w/v) and pepsin (Loba Chemie) at a concentration of 2 mg/ml for pepsin soluble collagen extraction. This solution was shaken for 48 hours at the same speed as specified above in a shaker machine; this is known as an enzymatic treatment. At the end of each extraction, all materials were filtered and kept at 4°C. 2.6 M sodium chloride solution was used to precipitate acid and enzymatic collagens (Merck). In a centrifuge, the precipitated material was spun for 30 minutes at 10,000 rpm (Model 6800, Kubota, Japan). The samples were re-suspended at five times the volume of 0.5 M acetic acid and stored at -20°C. The collagen sheets were powdered using a blender after the material was freeze-dried.

***Molecular weight determination of collagen by SDS-PAGE***

The molecular weight of collagen was determined using sodium dodecyl sulfate-polyacrylamide gel electrophoresis (SDS–PAGE). 1 ml collagen was boiled for 5 minutes in 0.5 M Tris–HCl buffer (1 % SDS, 10% glycerol, and 0.01 % bromophenol blue) at pH 6.8. A 4% stacking gel was placed on top of a 10% resolving gel in SDS-PAGE. Then 20 μL of the denatured collagen and 8 μL of marker with a molecular weight of 55, 70, 100, 130, and 250 kDa were loaded into different wells at the top of the polyacrylamide gel. After the mobility of proteins reached the resolving layer, the voltage was increased to 120 Volts for 3 hours to see the separation of proteins by size. Negatively charged proteins migrated to the anode as an electric current passed through the buffer, whereas lesser molecular weight proteins sank to the bottom of the gel. The gel was stained with 0.2 % Coomassie brilliant blue for 30 minutes in 50 % methanol and 10% acetic acid (v/v) after the proteins had migrated. The gel was destained by shaker at 40 rpm with 20% methanol and 5% acetic acid (v/v) and distilled water.

***Preparation of Mg/ZnO/Mg-ZnO solution***

Magnesium Metal (Mg) Coarse Powder (SRL/45149) was dissolved with the 1N HCl solution in the fume hood (BIOBASE, FHI 200, China). The solution concentration was 10mg/ml. Zine Oxide (ZnO) -Eugenol (Rongxiang Dental Material) was dissolved with the 1N NaOH solution in the fume hood (BIOBASE, FHI 200, China). The solution concentration was 10mg/ml. 5ml Mg and 5 ml ZnO are mixed for the Mg-ZnO solution.

***Fabrication of Hydroxyapatite-Chitosan-Collagen- Mg/ZnO/Mg-ZnO scaffolds***

Scaffolds were fabricated according to a previously described thermal-induced phase separation technique (TIPS) with some modifications [4]. Collagen and chitosan powder was weighed as required and dissolved in 0.5M acetic acid solution in a 250 ml beaker. The mixture was stirred for 2 hours at by stirring at 40 °C until the collagen and chitosan powder was thoroughly dispersed in a 0.5 M acetic acid solution. Then Mg/ZnO/Mg-ZnO solution was added to the mixture and stirred for 48 hours. The prepared solution was adjusted at about pH 6 using phosphoric acid (H3O4P, Sigma-Aldrich, USA) and stored at 4 °C for 24 h.

Finally, nHA powder was weighed as required and dissolved in distilled water. All solutions were mixed and stirred for 5 hours at room temperature to achieve a complete mixture. The resultant solutions were transferred to the petri dish and frozen at -40°C for 48 hours. To obtain scaffolds, the samples were then lyophilized (−80 °C, 005 mTorr) for 48 h and stored at desiccator until further usage.

Liquid to solid (L:S) ratio of 94:6 was used to fabricate scaffolds with different concentrations of metals (ZnO/Mg/ZnO-Mg), mineral to polymer (M:P) ratio of 2:1 with polymer to polymer (P:P) ratios 1:1, and gamma irradiation was applied at different dose 10,20, and 40 (KGy).


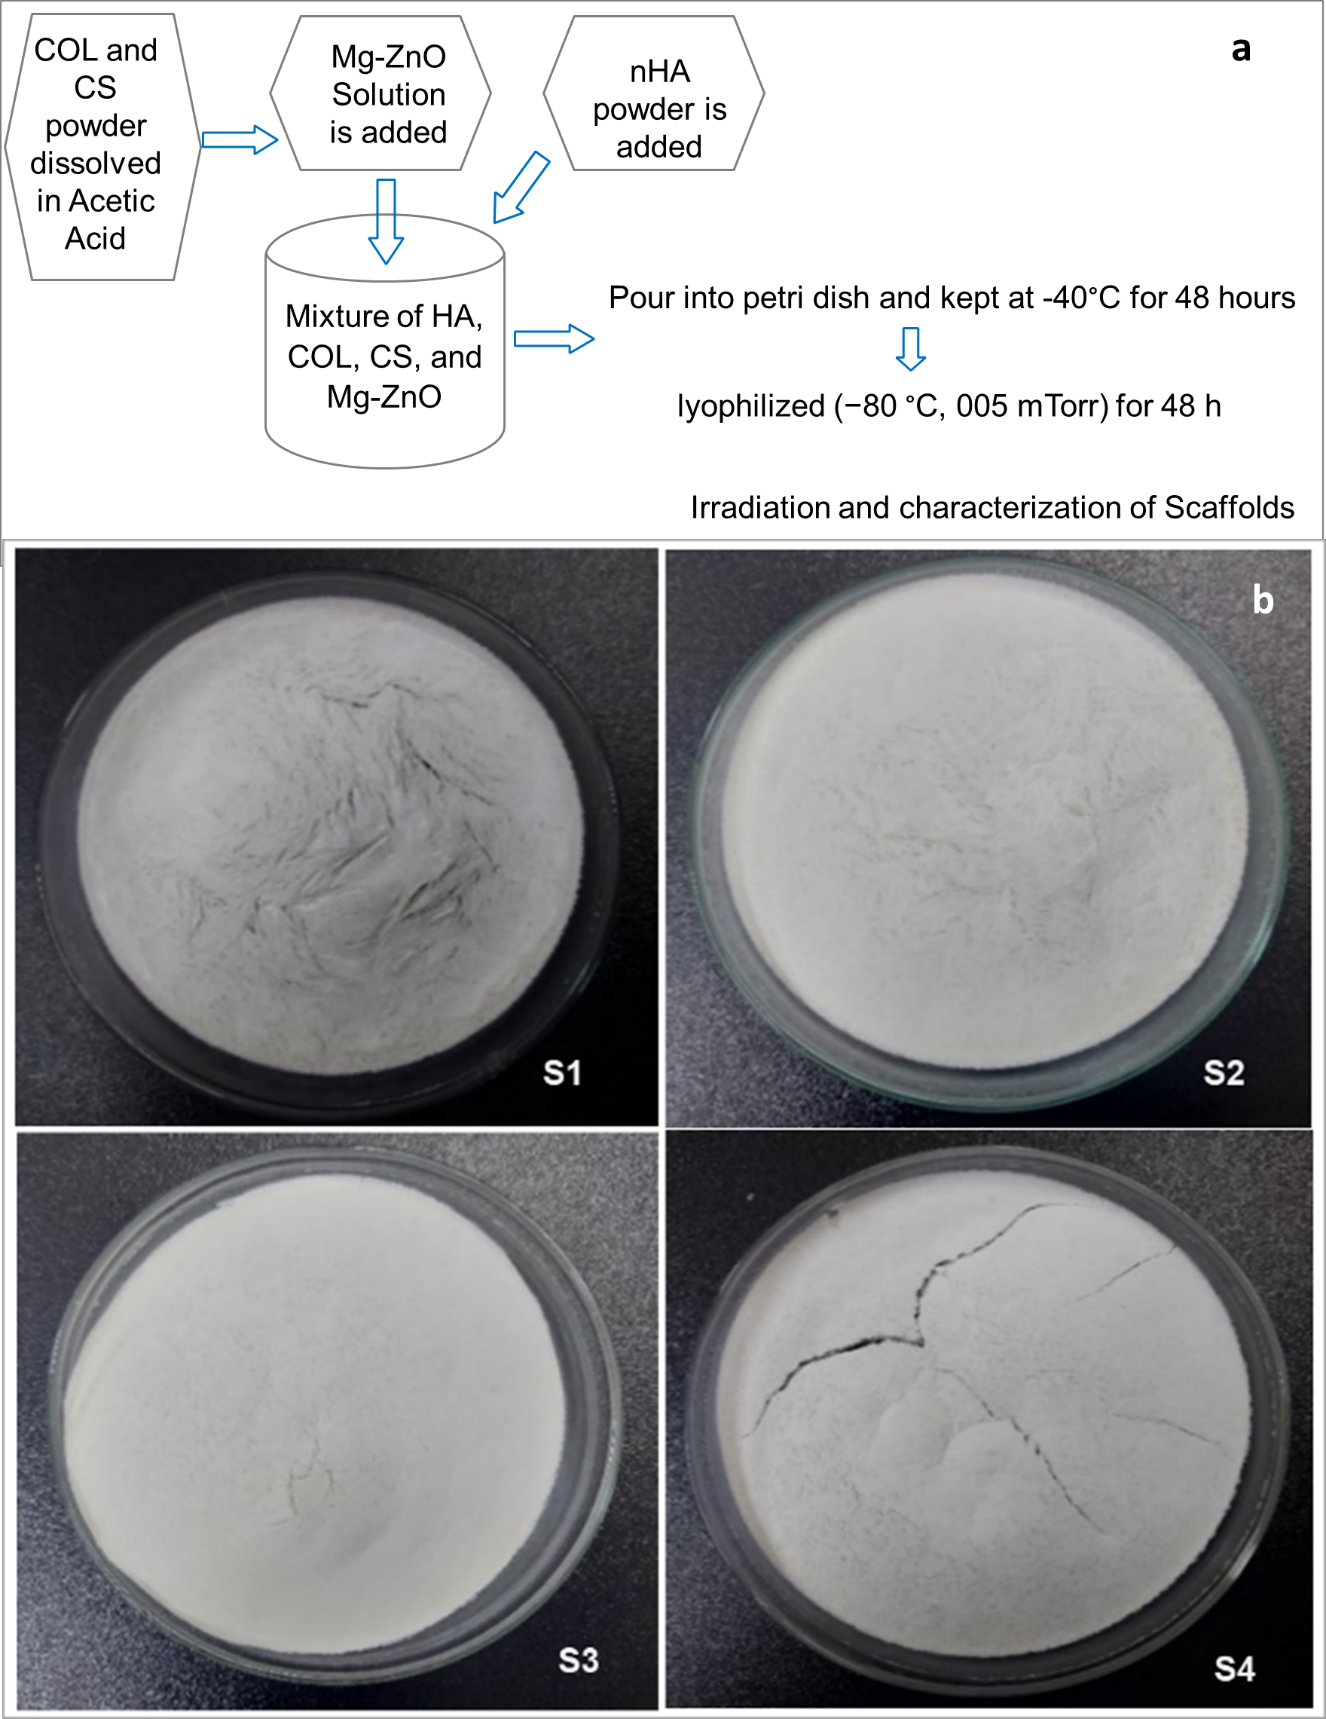


**FIGURE 1 Material preparation diagram of** Hydroxyapatite-Chitosan-Collagen (HA-COL-CS)-Mg-ZnO based scaffolds, S1 [HA-COL-CS-ZnO], S2 [ HA-COL-CS-Mg], S3 [HA-COL-CS-ZnO-Mg], S4 [HA-COL-CS]

***Porosity and density determination***

The porosity and density of the manufactured scaffolds were measured using a liquid displacement method [4]. Ethanol was chosen as the displacement solvent because it permeates the scaffolds without expanding or shrinking the matrix. Scaffolds were chopped into small pieces of weight W and immersed for five minutes in a graded cylinder containing a known volume of ethanol (V1). The cylinder was placed in a vacuum to drive the ethanol into the scaffold's pores until no air bubbles could be seen. V2 represents the total volume of the ethanol and scaffold. The volume difference (V2-V1) represented the volume of the scaffold's skeleton. The scaffold was removed from the ethanol, and the volume of the remaining ethanol was calculated as V3.

The total volume of the scaffold, V, was then V=V2-V3.

**Porosity (%) = (V1-V3) / (V2-V3)**

The apparent density of the scaffold, ρ was evaluated using,

**Density (ρ) = W / (V2-V3)**

***Swelling ability test***

Swelling ability was assessed by the percentage of water absorption. Each dried porous scaffold piece was weighed and designated as Wd. The porous scaffolds were then submerged in 5mL of pH 7.4 phosphate buffer solution (PBS) for 24 hours at 37°C. The scaffolds were removed from the PBS buffer solution at each time point and squeezed between filter paper to remove any leftover water in the pores, after which their wet weight, designated as WW, was determined [5]. The swelling ratio of the scaffold was calculated using the following equation: The swelling ratio of the scaffold was calculated using the following equation:

**Swelling ratio (%) = ((Ww – Wd)/Wd)** **× 100**

***Biodegradation test***

*In vitro* testing was used to determine the scaffolds' biodegradability. The scaffolds were immersed in PBS solution with lysozyme (2 mg/mL) for 7, 14, 21, and 28 days at 37°C. W0 stands for the initial scaffold weight [5, 6]. After washing in distilled water to remove ions, the scaffolds were freeze-dried. Wt was used to represent the scaffold's dry weight. The equation was used to calculate the scaffold's degradation.

**Biodegradability (%) = ((W0 – Wt)/ W0) × 100**

***In vitro cytotoxicity test by brine shrimp lethality bioassay***

The brine shrimp lethality bioassay method was used to determine *in vitro* cytotoxicity of scaffolds [7]. It is a primary toxicity screening approach that is used to screen bioactive substances. Brine shrimps (*Artemia salina*) were hatched in a conical flask (1L) filled with sterile artificial seawater using brine shrimp eggs. Sodium chloride (NaCl), potassium chloride (KCl), calcium chloride (CaCl2), magnesium chloride (MgCl2.6H2O), and magnesium sulfate (MgSO4.7H2O) were used to make artificial seawater and the pH was adjusted to 8.5 using 0.1N NaOH under continual aeration for 48 hours. After hatching, active nauplii free of eggshells were removed and used for the assay in a brighter part of the hatching chamber. The scaffold composites were dissolved in artificial seawater at concentrations of 0.625, 1.25, and 2.5 (mg/ mL) by tissue homogenizer and injected in petri dishes with active nauplii. The nauplii were counted after an overnight incubation period. The positive control was glutaraldehyde, while the negative control was distilled water. The equation was used to compute the nauplii mortality rate.

**Mortality Rate (%) = {(Initial count -Final count)/ Initial count} × 100**

***Antimicrobial activity test***

The colonies were collected and cultured in a nutrient broth medium for 18 hours at 37°C, adjusted to a turbidity of 0.5 McFarland standard, (1.00 × 108 CFU/ ml) based on the optical density (OD) measurement at 620 nm [8, 9]. Mueller Hinton agar medium (HIMEDIA/M173) was sterilized (121°C for 20 min) for the disc diffusion experiment. Then two bacteria were cultured for 24 hours on Mueller Hinton agar medium. Scaffold samples were allowed to diffuse into the agar plate and incubated at 37° C for 18 hours. The diameter of the growth inhibition zones (mm) surrounding each disc was used to measure antibacterial activity. Doxycycline (commercial antibiotic disc ~30 μg) was used as a positive control, and normal saline (0.9%) was used as a negative control.

**Results**

***Characterization of nano-hydroxyapatite (nHA)***

***Extraction yield coefficient of nHA***

The initial weight of small pieces of bones was 262 gm before thermal decomposition, followingly; 187 gm and 173 gm bones were found after sintering at 650°C and 950°C respectively. 145 gm of HA powder was collected after crushing and sieving. Finally, nHA was obtained by ball- milling and its final weight was 125 gm. The final extraction yield of nHA was 47.71%. Others extraction yield coefficient was also presented in table 2.

**TABLE 1 Extraction yield coefficient of nHA**

| Condition | Before sintering | 650°C | 950°C | HA powder | nHA powder |
| --- | --- | --- | --- | --- | --- |
| Weight (gram) | 262 gm | 187 gm | 173 gm | 145 gm | 125 gm |
| Yield coefficient (%) |  | 71.37 | 66.84 | 55.34 | 47.71 |

Note: * indicates selected samples for further investigation

**TABLE 2 Physiochemical study of HA-COL-CS-ZnO-Mg scaffold**

| Sample ID. | Composition | Irradiation  dose (KGy) | Porosity (%) | Density (g/cm3) | Swelling rate (%) | Remark |
| --- | --- | --- | --- | --- | --- | --- |
| S1 | HA-COL-CS-ZnO | 00 | 54.68±1.68 | 0.31±0.029 | 456.2±12.17 | * |
| S1-10 | 10 | 47.36±1.76 | 0.33±0.026 | 425.3±14.77 | * |
| S1-20 | 20 | 41.46±1.81 | 0.37±0.025 | 402.9±14.46 |  |
| S1-40 | 40 | 37.17±1.65 | 0.51±0.028 | 392±14.33 |  |
| S2 | HA-COL-CS-Mg | 00 | 60.33±2.05 | 0.24±0.013 | 592.4±16.09 | * |
| S2-10 | 10 | 50.07±1.55 | 0.26±0.017 | 539.2±12.24 | * |
| S2-20 | 20 | 42.75±1.21 | 0.29±0.023 | 407.8±15.82 |  |
| S2-40 | 40 | 34.41±2.22 | 0.33±0.022 | 372.7±12.75 |  |
| S3 | HA-COL-CS-ZnO-Mg | 00 | 61.40±1.87 | 0.24±0.025 | 580.7±13.05 | * |
| S3-10 | 10 | 50.37±1.53 | 0.37±0.034 | 557.8±12.72 | * |
| S3-20 | 20 | 41.26±2.18 | 0.51±0.043 | 548.1±16.28 |  |
| S3-40 | 40 | 37.33±1.84 | 0.64±0.032 | 531.5±13.33 |  |
| S4 | HA-COL-CS | 00 | 71.03±2.27 | 0.17±0.016 | 952.7±14.13 | * |
| S4-10 | 10 | 60.71±1.89 | 0.19±0.014 | 653.8±13.81 | * |
| S4-20 | 20 | 56.32±1.51 | 0.20±0.017 | 600.7±13.75 |  |
| S4-40 | 40 | 46.67±1.82 | 0.23±0.026 | 523.5±16.66 |  |

**TABLE 3 Biodegradability study of HA-COL-CS-Mg-ZnO scaffolds**

| Sample ID | Biodegradability rate % | | | | | |
| --- | --- | --- | --- | --- | --- | --- |
| **7 days** | **Lysozyme**  **7 days** | **14 days** | **21 days** | **28 days** | **Remark** |
| S1 | 38.60±3.24 | 46.06±2.89 | 54.97±2.88 | 61.29±3.26 | 65.90± 4.11 | * |
| S1-10 | 44.04±3.43 | 53.25±3.33 | 61.91±3.50 | 75.17±4.02 | Degrade | * |
| S1-20 | 55.41±2.99 | 69.39±3.45 | 68.44±2.83 | Degrade | Degrade |  |
| S1-40 | 63.36±3.32 | 80.37±3.43 | 75.60±3.68 | Degrade | Degrade |  |
| S2 | 40.10±2.92 | 50.37±2.76 | 66.30±2.15 | 74.51±3.40 | 91.54±2.90 | * |
| S2-10 | 54.22±3.14 | Degrade | 82.81±3.63 | Degrade | Degrade | * |
| S2-20 | 63.77±2.67 | Degrade | Degrade | Degrade | Degrade |  |
| S2-40 | Degrade | Degrade | Degrade | Degrade | Degrade |  |
| S3 | 40.98±3.34 | 42.14±3.35 | 58.21±3.34 | 65.81±3.60 | 72.62±3.76 | * |
| S3-10 | 48.28±2.58 | 46.37±3.055 | 64.11±3.28 | 80.98±2.99 | Degrade | * |
| S3-20 | 58.13±3.28 | Degrade | 71.83±3.73 | Degrade | Degrade |  |
| S3-40 | 66.09±3.66 | Degrade | Degrade | Degrade | Degrade |  |
| S4 | 43.97±2.56 | 59.32±3.66 | 58.29±3.23 | 71.08±2.90 | 88.42±3.34 | * |
| S4-10 | 52.07±3.76 | Degrade | 90.09±3.56 | Degrade | Degrade | * |
| S4-20 | 64.74±3.73 | Degrade | Degrade | Degrade | Degrade | * |
| S4-40 | 71.32±3.38 | Degrade | Degrade | Degrade | Degrade |  |

Note: * indicates selected samples for further investigation

**TABLE 4 Functional groups of HA-COL-CS-Mg-ZnO scaffolds in ATR spectrum**

| Components | Functional group | ATR wavenumber (cm-1) |
| --- | --- | --- |
| HA | PO4-3 | 602, 952 and 1035 |
| OH- | 3572 |
| CO32- | 1450 and 876 |
| Collagen | Amide-A | 3299 |
| Amide-B | 2950 and 2919 |
| Amide I | 1632-1664 |
| Amide II | 1500-1585 |
| Amide III | 1200-1300 |
| Chitosan | OH- and N-H | 3430 |
| C-H | 2845 |
| Amide I and II | 1637 and 1543 |
| Mg-ZnO | Ionic bond | 562, 843, 1000, and ~4000 |

**TABLE 5 Mechanical strength of HA-COL-CS-Mg-ZnO scaffolds**

| Scaffold ID | Gauge length (mm) | Width (mm) | Thickness  (mm) | Maximum force (N) | Tensile strength  (N/mm2) |
| --- | --- | --- | --- | --- | --- |
| S1 | 26 | 8.10 | 2.83 | 55.29 | 2.41± 0.07 |
| S1-10 | 18 | 6.24 | 3.88 | 25.70 | 1.06±0.08 |
| S2 | 27 | 8.62 | 4.50 | 28.05 | 0.72±0.05 |
| S2-10 | 24 | 7.71 | 2.68 | 18.27 | 0.88±0.06 |
| S3 | 25 | 7.20 | 4.15 | 24.43 | 0.82±0.06 |
| S3-10 | 23 | 7.89 | 3.26 | 47.76 | 1.86±0.09 |
| S4 | 25 | 8.68 | 5.36 | 26.27 | 0.56±0.07 |
| S4-10 | 25 | 6.65 | 3.04 | 28.00 | 1.38±0.05 |

***Field emission scanning electron microscope (FESEM) analysis of scaffolds***

The average pore size of the non-irradiated S3 (HA-COL-CS-Mg-ZnO) and irradiated (S3-10) scaffolds were 207.24 μm and 120.25 μm μm respectively which is demonstrated in Fig. 2. Here, the pore diameter was decreased after applying gamma irradiation on these scaffolds.


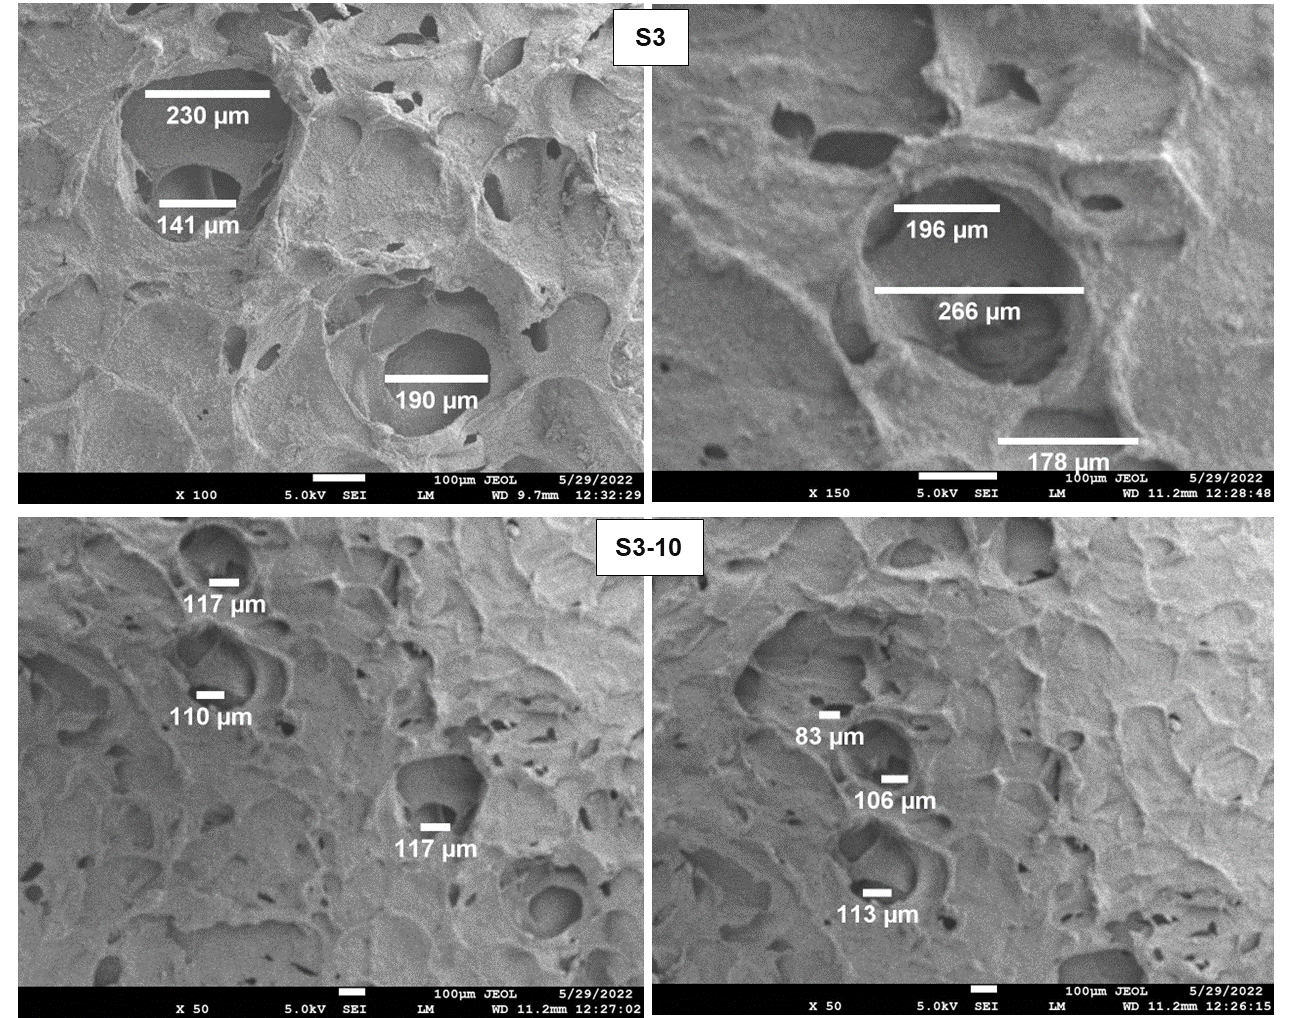


**FIGURE. 2** Field emission scanning electron microscopy (FESEM) of HA-COL-CS-Mg-ZnO based scaffolds

**REFERENCES**

1. Qu H, Fu H, Han Z, Sun Y (2019) Biomaterials for bone tissue engineering scaffolds: A review. RSC Adv 9:26252–26262. https://doi.org/10.1039/c9ra05214c
2. Rana MM, Akhtar N, Rahman MS, Hasan MZ, Asaduzzaman SM (2017) Extraction and characterization of hydroxyapatite from bovine cortical bone and effect of radiation. Int. J. Biosci 11(3):20-30. https://doi.org/10.12692/ijb/11.3.20-30
3. Martínez-Ortiz MA, Hernández-Fuentes AD, Pimentel-González DJ, Campos-Montiel RG, Vargas-Torres A, Aguirre-Álvarez G (2015) Extraction and characterization of collagen from rabbit skin: partial characterization. CYTA J Food Apr 3;13(2):253 8. https://doi.org/10.1080/19476337.2014.946451
4. Kim SI, Kim NE, Park S, Choi JH, Lee Y, Jeon G, Khang G (2022) Characterization of non-solvent-and thermal-induced phase separation applied polycaprolactone/demineralized bone matrix scaffold for bone tissue engineering. In vitro models, 1(2), 197-207. https://doi.org/10.1007/s44164-022-00018-9
5. Rahman MS, Rana MM, Spitzhorn LS, Akhtar N, Hasan MZ, Choudhury N, Fehm T, Czernuszka JT, Adjaye J, Asaduzzaman SM (2019) Fabrication of biocompatible porous scaffolds based on hydroxyapatite/collagen/chitosan composite for restoration of defected maxillofacial mandible bone. Prog Biomater 8(3):137–154. https://doi.org/10.1007/s40204-019-0113-x
6. Mulazzi M, Campodoni E, Bassi G, Montesi M, Panseri S, Bonvicini F, Gentilomi GA, Tampieri A, Sandri M (2021) Medicated hydroxyapatite/collagen hybrid scaffolds for bone regeneration and local antimicrobial therapy to prevent bone infections. Pharmaceutics 13(7). https://doi.org/10.3390/pharmaceutics13071090
7. Saxena V, Hasan A, Pandey LM (2021) Antibacterial nano-biocomposite scaffolds of Chitosan, Carboxymethyl Cellulose and Zn & Fe integrated Hydroxyapatite (Chitosan-CMC-FZO@HAp) for bone tissue engineering. Cellulose 28(14):9207–9226. https://doi.org/10.1007/s10570-021-04072-6
8. Sultana T, Rana M, Akhtar M, Hasan Z, Talukder AH, Aseduzzaman SM (2017) Preparation and physicochemical characterization of nano-hydroxyapatite-based 3D porous scaffold for biomedical application. Adv Tissue Eng Regen Med Open Access, 3(3):00065. https://doi.org/10.15406/atroa.2017.03.00065
9. Li C, Qin W, Lakshmanan S, Ma X, Sun X, Xu B (2020) Hydroxyapatite based biocomposite scaffold: A highly biocompatible material for bone regeneration. Saudi J Biol Sci, 27(8):2143-2148. <https://doi.org/10.1016/j.sjbs.2020.05.029>
